# Supplementary material for: Safety Evaluation of Heavy Metal Contamination and Pesticide Residues in Coix Seeds in Guizhou Province, China
Source: MDPI journal article supplement (doi:10.3390/foods11152286), 2022-07-31
Supplement: s1 [file s1]

# Supplementary Materials: Safety Evaluation of Heavy Metal Contamination and Pesticide Residues in Coix Seeds in Guizhou Province, China

Jiaxing Yu, Xiangui Wang, Xiaolong Yao, Xiaomao Wu

**Table S1.** The scoring standard for the risk ranking index of pesticide residues in coix seed.

| Index                    | Value                                    | Score |
|--------------------------|------------------------------------------|-------|
| Toxicity                 | Low                                      | 2     |
|                          | Moderate                                 | 3     |
|                          | High                                     | 4     |
|                          | Severe, carcinogenic                     | 5     |
| Toxic effect             | $>1 \times 10^{-2}$                      | 0     |
|                          | $1 \times 10^{-4} \sim 1 \times 10^{-2}$ | 1     |
|                          | $1 \times 10^{-6} \sim 1 \times 10^{-4}$ | 2     |
|                          | $<1 \times 10^{-6}$                      | 3     |
| Dietary proportion       | $<2.5$                                   | 0     |
|                          | 2.5 ~ 20                                 | 1     |
|                          | 20 ~ 50                                  | 2     |
|                          | 50 ~ 100                                 | 3     |
| Usage frequency          | $<2.5$                                   | 0     |
|                          | 2.5 ~ 20                                 | 1     |
|                          | 20 ~ 50                                  | 2     |
|                          | 50 ~ 100                                 | 3     |
| High exposure population | None                                     | 0     |
|                          | Not too possible                         | 1     |
|                          | Probably                                 | 2     |
|                          | With or without relevant data            | 3     |
| Residual level           | Not detected                             | 1     |
|                          | $<1\text{MRL}$                           | 2     |
|                          | $\geq 1\text{MRL}$                       | 3     |
|                          | $\geq 10\text{MRL}$                      | 4     |
